# Supplementary material for: Probing Ca2+-induced conformational change of calmodulin with gold nanoparticle-decorated single-walled carbon nanotube field-effect transistors
Source: Royal Society of Chemistry journal article supplement (doi:10.1039/c9nr03132d), 2019-01-01
Supplement: c9nr03132d1.pdf [file c9nr03132d1.pdf]

# Probing Ca<sup>2+</sup>-induced conformational change of Calmodulin with gold nanoparticle-decorated single-walled carbon nanotube field-effect transistors

*Wenting Shao<sup>†</sup>, Seth C. Burkert<sup>†</sup>, David L. White<sup>†</sup>, Valerie L. Scott<sup>†</sup>, Jianfu Ding<sup>‡</sup>, Zhao Li<sup>‡</sup>, Jianying Ouyang<sup>‡</sup>, Francois Lapointe<sup>‡</sup>, Patrick R. L. Malenfant<sup>‡</sup>, Kabirul Islam<sup>†</sup>, Alexander Star<sup>\*‡</sup>*

<sup>†</sup> Department of Chemistry, University of Pittsburgh, Pittsburgh, Pennsylvania 15260, United States

<sup>‡</sup> Security and Disruptive Technologies Portfolio, National Research Council Canada, 1200 Montreal Road, Ottawa, Ontario, K1A 0R6, Canada

## Table of Contents

|                                                                                                           |     |
|-----------------------------------------------------------------------------------------------------------|-----|
| Figure S1 SEM images of AuNPs decorated un-SWCNTs and AuNPs decorated sc-SWCNTs                           | S2  |
| Figure S2 AFM image and height profile of Au-SWCNTs and CaM-Au-SWCNTs                                     | S3  |
| Figure S3 RBM peaks of un-SWCNT and sc-SWCNT under 785 nm laser excitation                                | S4  |
| Figure S4 Circular Dichroism solution spectra of calcium-free CaM and calcium-bound CaM                   | S5  |
| Figure S5 Expression and purification of EGFP-CaM                                                         | S6  |
| Figure S6 Device reproducibility of un-SWCNT and sc-SWCNT FET devices                                     | S7  |
| Figure S7 Control experiments of un-SWCNT and sc-SWCNT FET devices                                        | S8  |
| Figure S8 Comparison of source-drain current ( $I_d$ ) and gate leakage current ( $I_g$ )                 | S9  |
| Figure S9 FET characteristic curves of CaM-Au-un-SWCNT and CaM-Au-sc-SWCNT FET device                     | S10 |
| Figure S10 Absolute relative response of CaM-Au-SWCNT FET devices to 10 <sup>-11</sup> M Ca <sup>2+</sup> | S11 |
| Table S1 Comparison of various methods for Ca <sup>2+</sup> detection                                     | S12 |
| References                                                                                                | S13 |

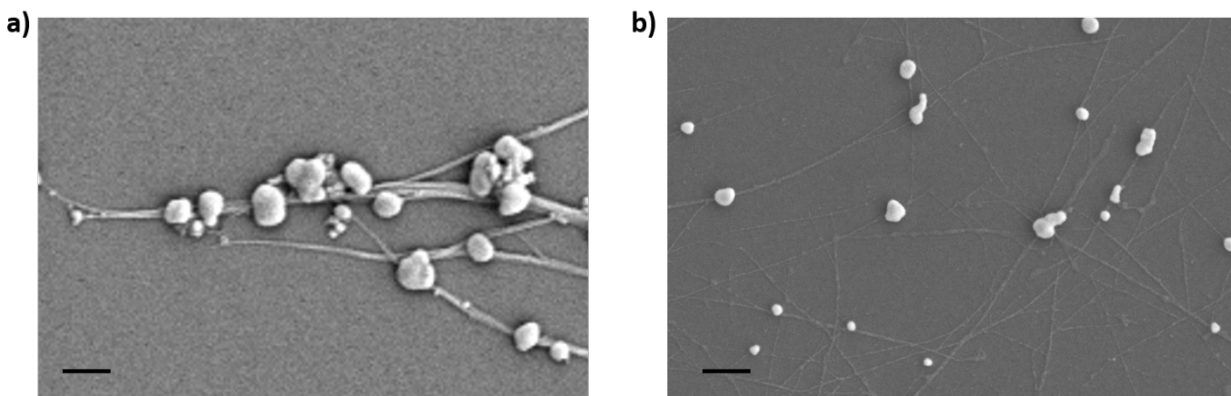

**Figure S1.** SEM images of a) AuNPs decorated un-SWCNTs and b) AuNPs decorated sc-SWCNTs. Both SEM images show an area of 1578 nm X 2353 nm on the device surface. It can be observed that less un-SWCNTs were deposited on the substrate than sc-SWCNT, indicating that sc-SWCNT formed denser networks than un-SWCNTs. (Scale bar: a) 200 nm; b) 200 nm)

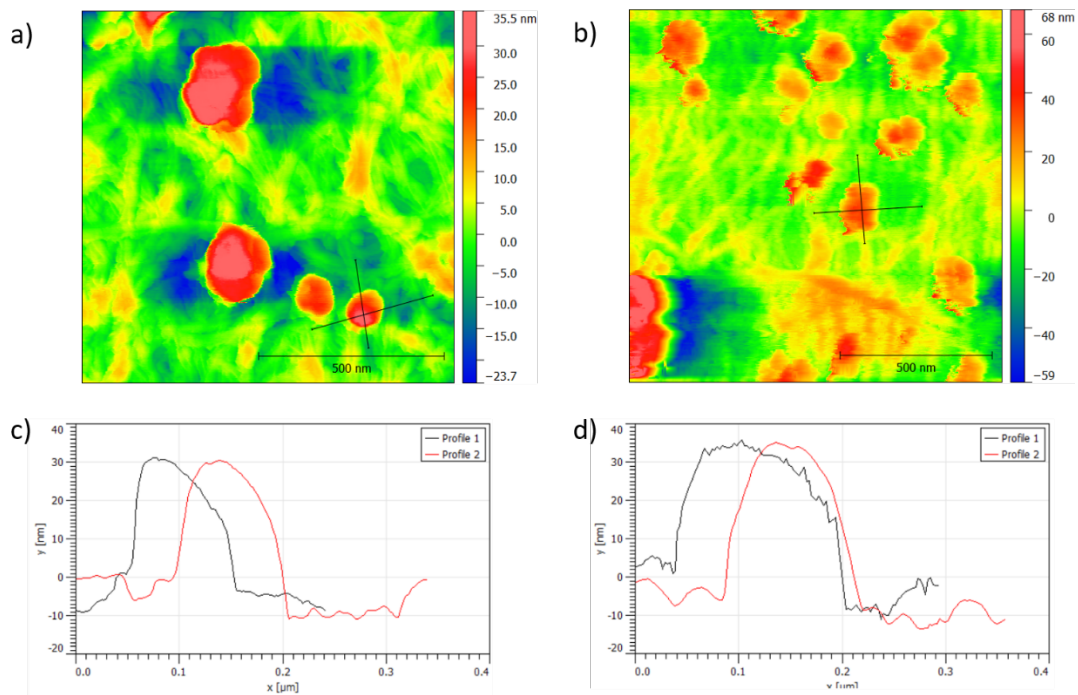

**Figure S2.** a) Atomic force microscopy (AFM) image of AuNP decorated sc-SWCNTs. b) AFM image of Au-SWCNTs after CaM binding. c) Height profile of Au-sc-SWCNTs. d) Height profile of CaM-Au-sc-SWCNTs.

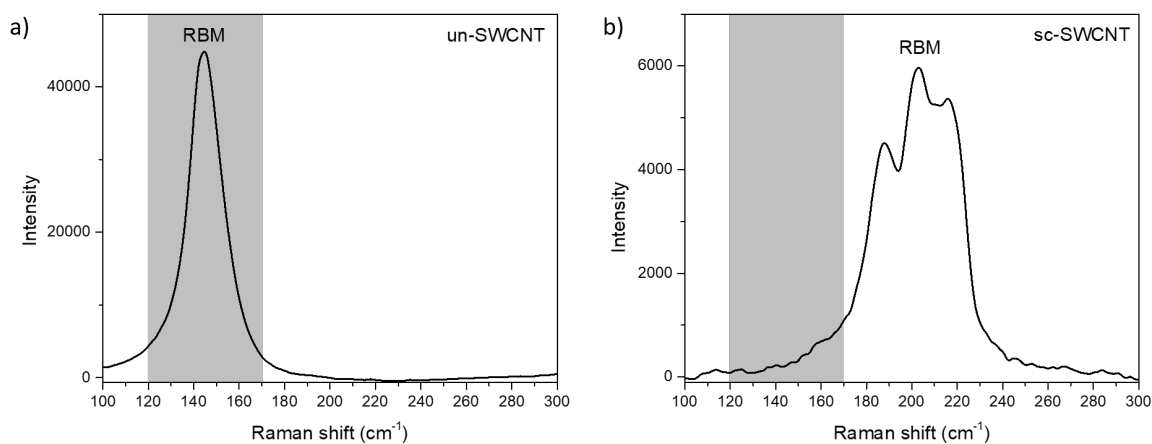

**Figure S3.** RBM peaks of a) un-SWCNT and b) sc-SWCNT under 785 nm laser excitation. Peaks in the shaded area from 120  $\text{cm}^{-1}$  to 170  $\text{cm}^{-1}$  are associated with the metallic features of SWCNTs. un-SWCNT has an RBM peak centered around 145  $\text{cm}^{-1}$ . In contrast, this peak is absent in sc-SWCNT, a broad and splitting RBM peak arises at 204  $\text{cm}^{-1}$  instead. This result confirms the high purity content of sc-SWCNT.<sup>S1-</sup>

S3

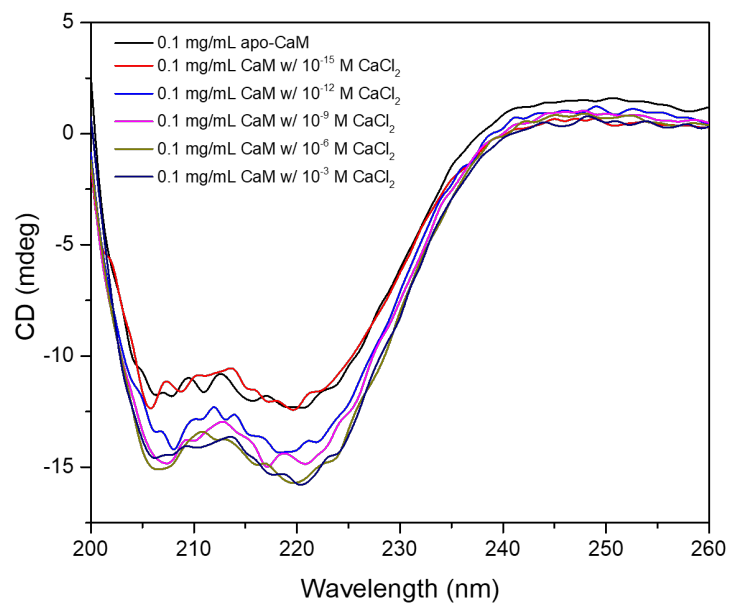

**Figure S4.** Circular Dichroism solution spectra of calcium-free CaM (apo-CaM) and calcium-bound CaM with different concentrations of CaCl<sub>2</sub>.

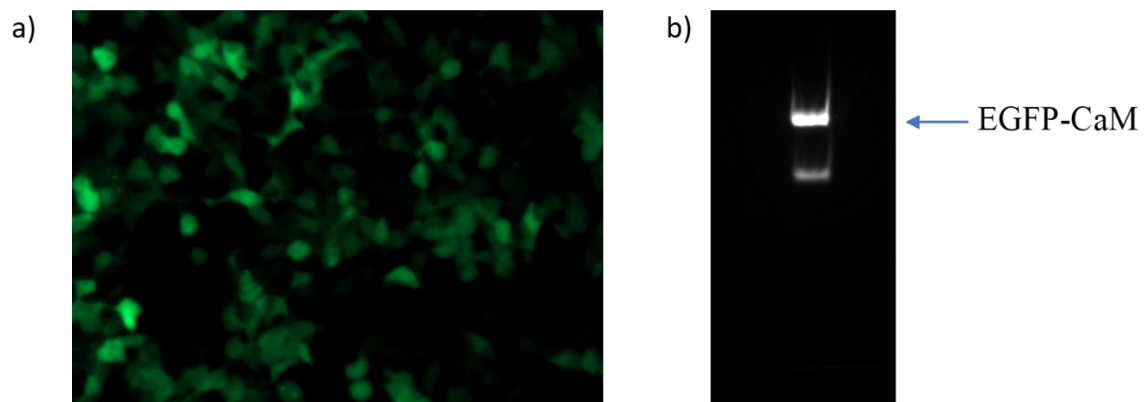

**Figure S5.** a) Successful expression of EGFP-CaM in HEK293T cells was confirmed by live-cell imaging using Zeiss microscope. b) In-gel fluorescence showing purified EGFP-CaM protein.

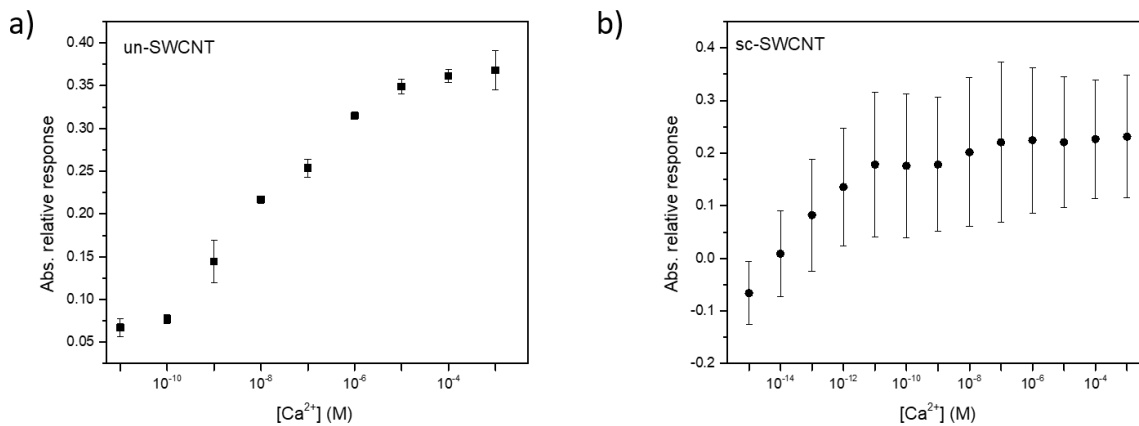

**Figure S6.** Device reproducibility of a) un-SWCNT and b) sc-SWCNT FET devices. For both types of devices, the calibration curve was constructed by plotting the averaged relative conductance changes from multiple devices at  $-0.5 \text{ V}_g$  against concentrations of  $\text{Ca}^{2+}$  solution. Error bars were calculated from 4 different devices for un-SWCNT devices, and 5 different devices for sc-SWCNT devices. The larger error bars for sc-SWCNT devices suggest larger device-to-device variations for sc-SWCNT devices.

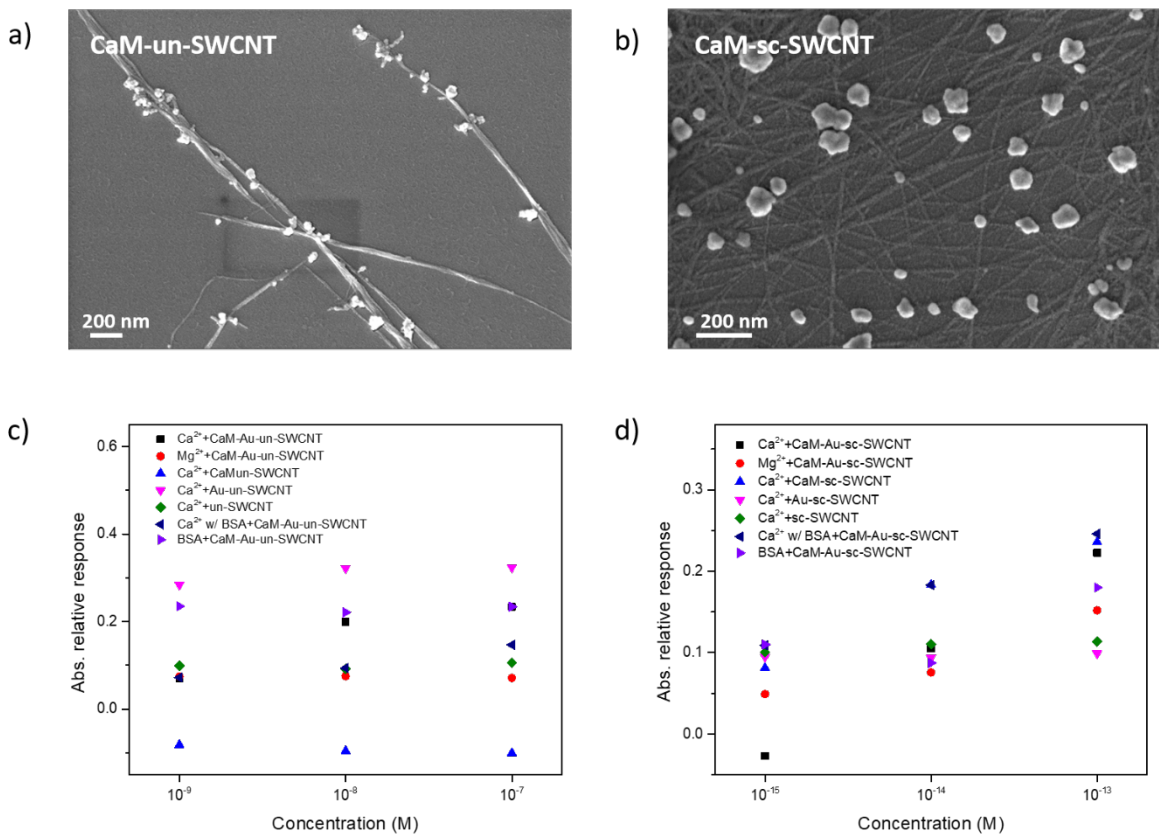

**Figure S7.** a) SEM image of CaM on un-SWCNT networks. b) SEM image of CaM on sc-SWCNT networks. c) Calibration plot of the active system and control systems of un-SWCNT FET devices. d) Calibration plot of the active system and control systems of sc-SWCNT FET devices in the corresponding linear range.



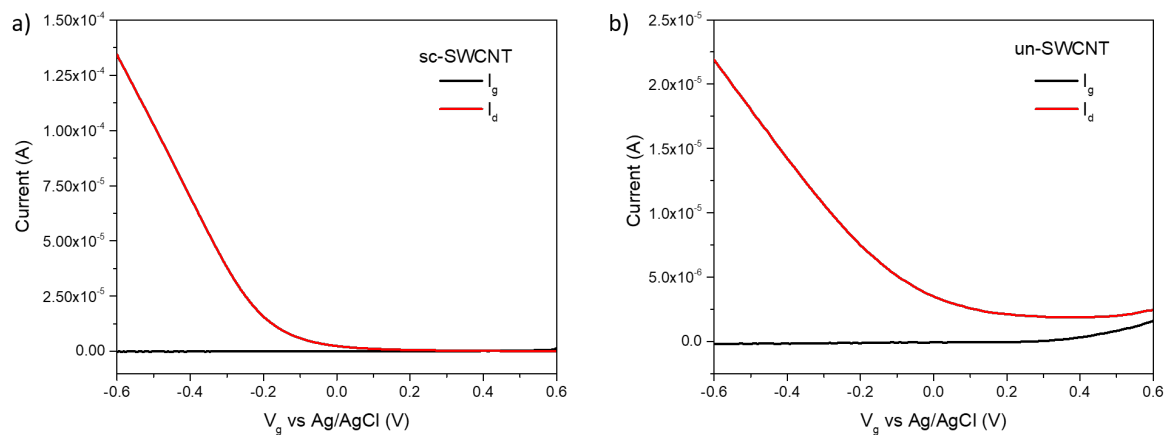

**Figure S8.** Comparison of source-drain current ( $I_d$ ) and gate leakage current ( $I_g$ ) for a) sc-SWCNT and b) un-SWCNT FET devices. The gate current is insignificant compared to the source-drain current, therefore the effect of leakage current is negligible.

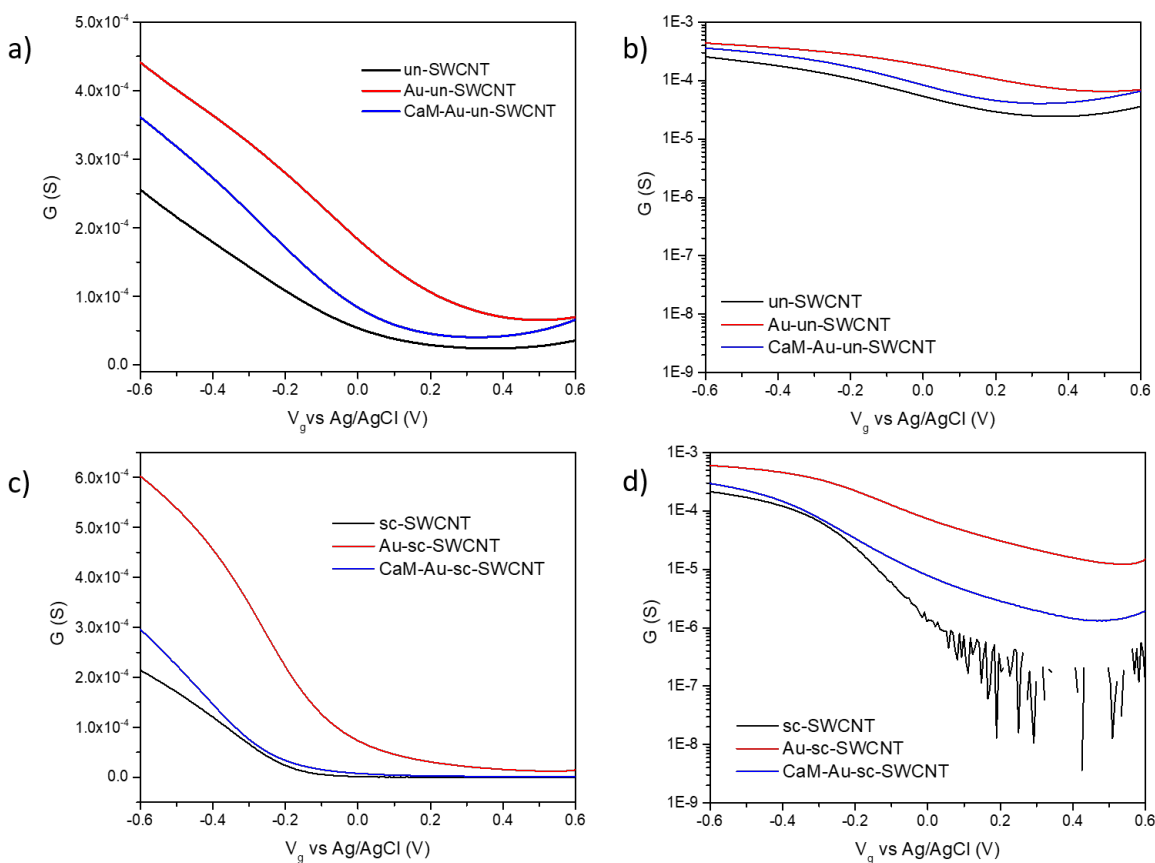

**Figure S9.** a) FET characteristic curves of CaM-Au-un-SWCNT FET device during each step of functionalization plotting in linear scale and b) logarithmic scale. c) FET characteristic curves of CaM-Au-sc-SWCNT FET device during each step of functionalization plotting in linear scale and d) logarithmic scale. The on/off ratio of un-SWCNT FET device was  $\sim 3$ , while the on/off ratio of sc-SWCNT FET device was  $\sim 10^4$ . sc-SWCNT FET devices show better on/off ratio due to the lack of metallic carbon nanotubes, therefore efficiently turning off the device.

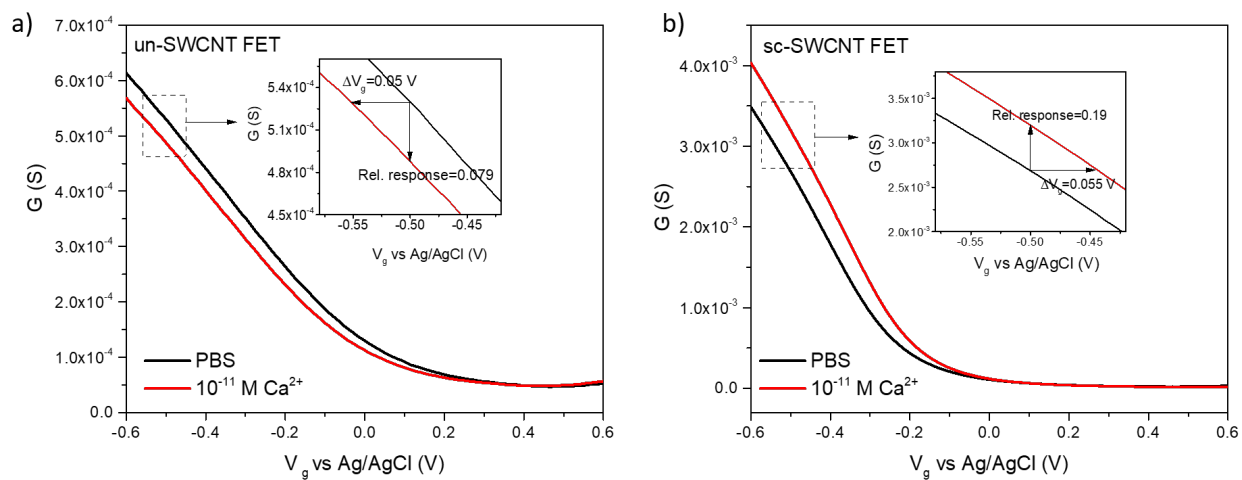

**Figure S10.** Absolute relative response of a) CaM-Au-un-SWCNT FET device and b) CaM-Au-sc-SWCNT FET device to  $10^{-11}$  M  $\text{Ca}^{2+}$ . With higher on/off ratio, sc-SWCNT FET device had a significant higher absolute relative response than un-SWCNT FET device, even though the shift of gate voltage was similar.

**Table S1.** Comparison of various methods for Ca<sup>2+</sup> detection

| <b>Ca<sup>2+</sup> detection method</b>                  | <b>Ca<sup>2+</sup> detection limit</b> | <b>Reference in the main text</b> |
|----------------------------------------------------------|----------------------------------------|-----------------------------------|
| <b>Ca<sup>2+</sup> selective PVC-membrane electrode</b>  | $7.5 \times 10^{-7}$ M                 | 61                                |
| <b>Solid-contact Ca<sup>2+</sup> selective electrode</b> | $(3.4-8.2) \times 10^{-6}$ M           | 62                                |
| <b>NiCo<sub>2</sub>O<sub>4</sub>/3-D Graphene</b>        | 0.38 $\mu$ M                           | 63                                |
| <b>Fluorescent carbon quantum dot</b>                    | 77 pM (in human serum)                 | 64                                |
| <b>CaM-Au-sc-SWCNT FET</b>                               | $10^{-15}$ M                           | This work                         |

## References

- S1. Ding, J.; Li, Z.; Lefebvre, J.; Cheng, F.; Dunford, J. L.; Malenfant, P. R.; Humes, J.; Kroeger, J., A hybrid enrichment process combining conjugated polymer extraction and silica gel adsorption for high purity semiconducting single-walled carbon nanotubes (SWCNT). *Nanoscale* **2015**, *7*, 15741–15747.
- S2. Li, Z.; Ding, J.; Finnie, P.; Lefebvre, J.; Cheng, F.; Kingston, C. T.; Malenfant, P. R. L., Raman microscopy mapping for the purity assessment of chirality enriched carbon nanotube networks in thin-film transistors. *Nano Res.* **2015**, *8*, 2179–2187.
- S3. Ding, J.; Li, Z.; Lefebvre, J.; Cheng, F.; Dubey, G.; Zou, S.; Finnie, P.; Hrdina, A.; Scoles, L.; Lopinski, G. P.; Kingston, C. T.; Simard, B.; Malenfant, P. R., Enrichment of large-diameter semiconducting SWCNTs by polyfluorene extraction for high network density thin film transistors. *Nanoscale* **2014**, *6*, 2328–2339.
